# Supplementary material for: Field-induced anti-nematic and biaxial ordering in binary mixtures of discotic mesogens and spherical magnetic nanoparticles
Source: Royal Society of Chemistry journal article supplement (doi:10.1039/d0sm01366h), 2020-01-01
Supplement: d0sm01366h1.pdf [file d0sm01366h1.pdf]

## Supplementary Information for:

# Field-induced anti-nematic and biaxial ordering in binary mixtures of discotic mesogens and spherical magnetic nanoparticles

Stavros D. Peroukidis,<sup>\*a</sup> Sabine H. L. Klapp,<sup>b</sup> and Alexandros G. Vanakaras<sup>c</sup>

<sup>a</sup>Department of Chemical Engineering, University of Patras, 26504 Patras, Greece. E-mail: peroukid@upatras.gr and Hellenic Open University, 26222 Patras, Greece <sup>b</sup>Institute of Theoretical Physics, Secr. EW 7-1, Technical University of Berlin, Hardenbergstr. 36, D-10623 Berlin, Germany. <sup>c</sup>Department of Materials Science, University of Patras, 26504 Patras, Greece.

## I. DETAILS ON THE GAY BERNE POTENTIAL

The discs interact via a modified Gay-Berne (GB) potential, that is, [1]

$$U_{ij}^r(\hat{\mathbf{u}}_i, \hat{\mathbf{u}}_j, \mathbf{r}_{ij}) = 4\varepsilon(\hat{\mathbf{u}}_i, \hat{\mathbf{u}}_j, \hat{\mathbf{r}}_{ij}) \left[ \left( \frac{\sigma_0}{|\mathbf{r}_{ij}| - \sigma(\hat{\mathbf{u}}_i, \hat{\mathbf{u}}_j, \hat{\mathbf{r}}_{ij}) + \sigma_0} \right)^{12} - \left( \frac{\sigma_0}{|\mathbf{r}_{ij}| - \sigma(\hat{\mathbf{u}}_i, \hat{\mathbf{u}}_j, \hat{\mathbf{r}}_{ij}) + \sigma_0} \right)^6 \right]. \quad (1)$$

The range parameter  $\sigma$  of two dislike particles of thickness  $l$  and diameter  $\sigma_0$  is,

$$\sigma(\hat{\mathbf{u}}_i, \hat{\mathbf{u}}_j, \hat{\mathbf{r}}_{ij}) = \sigma_0 \left( 1 - \frac{\chi}{2} \left[ \frac{(\hat{\mathbf{r}}_{ij} \cdot \hat{\mathbf{u}}_i + \hat{\mathbf{r}}_{ij} \cdot \hat{\mathbf{u}}_j)^2}{1 + \chi \hat{\mathbf{u}}_i \cdot \hat{\mathbf{u}}_j} + \frac{(\hat{\mathbf{r}}_{ij} \cdot \hat{\mathbf{u}}_i - \hat{\mathbf{r}}_{ij} \cdot \hat{\mathbf{u}}_j)^2}{1 - \chi \hat{\mathbf{u}}_i \cdot \hat{\mathbf{u}}_j} \right] \right)^{-\frac{1}{2}} \quad (2)$$

where  $\chi = (l^2/\sigma_0^2 - 1)/(l^2/\sigma_0^2 + 1)$ ,  $\hat{\mathbf{u}}_i$  is the director along the principal axis of particle  $i$  and  $\mathbf{r}_{ij}$  is the connecting vector between the centre of masses of particles  $i$  and  $j$ .

The strength anisotropy parameter in Eq. (1) is given by

$$\varepsilon(\hat{\mathbf{u}}_i, \hat{\mathbf{u}}_j, \hat{\mathbf{r}}_{ij}) = \varepsilon_0 [\varepsilon_1(\hat{\mathbf{u}}_i, \hat{\mathbf{u}}_j)]^\nu [\varepsilon_2(\hat{\mathbf{u}}_i, \hat{\mathbf{u}}_j, \hat{\mathbf{r}}_{ij})]^\mu \quad (3)$$

with  $\varepsilon_0$ ,  $\varepsilon_1(\hat{\mathbf{u}}_i, \hat{\mathbf{u}}_j) = [1 - \chi^2(\hat{\mathbf{u}}_i \cdot \hat{\mathbf{u}}_j)^2]^{-\frac{1}{2}}$  and  $\mu$ ,  $\nu$  are adjustable exponents. The  $\varepsilon_2(\hat{\mathbf{u}}_i, \hat{\mathbf{u}}_j, \hat{\mathbf{r}}_{ij})$  parameter adjusts the well depth ratio for the edge-to-edge ( $\varepsilon_e$ ) to face-to-face ( $\varepsilon_f$ ) configuration of the disc particles [2] by introducing the parameter  $\chi' = (\varepsilon_e^{1/\mu} - \varepsilon_f^{1/\mu})/(\varepsilon_e^{1/\mu} + \varepsilon_f^{1/\mu})$ , that is,

$$\varepsilon_2(\hat{\mathbf{u}}_i, \hat{\mathbf{u}}_j, \hat{\mathbf{r}}_{ij}) = 1 - \frac{\chi'}{2} \left[ \frac{(\hat{\mathbf{r}}_{ij} \cdot \hat{\mathbf{u}}_i + \hat{\mathbf{r}}_{ij} \cdot \hat{\mathbf{u}}_j)^2}{1 + \chi' \hat{\mathbf{u}}_i \cdot \hat{\mathbf{u}}_j} + \frac{(\hat{\mathbf{r}}_{ij} \cdot \hat{\mathbf{u}}_i - \hat{\mathbf{r}}_{ij} \cdot \hat{\mathbf{u}}_j)^2}{1 - \chi' \hat{\mathbf{u}}_i \cdot \hat{\mathbf{u}}_j} \right]. \quad (4)$$

For the interaction between pairs of discs and spheres we also use the Gay-Berne potential of Eq. (1). The  $\sigma_{ds}$  parameter depends only on the orientation of disc  $j$ ,  $\hat{\mathbf{u}}_j$ , and the normalized vector  $\hat{\mathbf{r}}_{ij}$  connecting to the centre-of-mass of sphere  $i$ , that is, [3]

$$\sigma_{ds}(\hat{\mathbf{u}}_j, \hat{\mathbf{r}}_{ij}) = \sigma_0^{ds} [1 - \chi''(\hat{\mathbf{r}}_{ij} \cdot \hat{\mathbf{u}}_j)^2]^{-\frac{1}{2}} \quad (5)$$

where  $\sigma_0^{ds} = \frac{1}{2}(\sigma_0 + \sigma_s)$  and  $\chi'' = (l^2 - \sigma_0^2)/(l^2 + \sigma_s^2)$ . Similarly, the strength anisotropy for pairs of discs and spheres becomes

$$\varepsilon_{rs}(\hat{\mathbf{u}}_j, \hat{\mathbf{r}}_{ij}) = \varepsilon_0 [1 - \chi'''(\hat{\mathbf{r}}_{ij} \cdot \hat{\mathbf{u}}_j)^2]^\mu \quad (6)$$

where the disc-sphere well-depth anisotropy is given by  $\chi''' = 1 - (\varepsilon_e/\varepsilon_s)^{1/\mu}$ . For our calculations we choose a set of parameters from well studied monodispersed system of disc particles [2], that is,  $l/\sigma_0 = 0.345$ ,  $\varepsilon_e/\varepsilon_f = 0.2$ ,  $\mu = 2$  and  $\nu = 1$ . The values of the ratio  $\varepsilon_s/\varepsilon_e$  are given and discussed in the main manuscript. In the present study the diameter of the spheres  $\sigma_s$  remains as an adjustable parameter with  $\sigma_s^* = \sigma_s/\sigma_0$ .

- 
- [1] D. Antypov and D. J. Cleaver, J. Chem. Phys. **120**, 10307 (2004).
  - [2] O. Cienega-Cacerez, J. A. Moreno-Razo, E. Díaz-Herrera, and E. J. Sambriski, Soft Matter **10**, 3171 (2014).
  - [3] D. J. Cleaver, C. M. Care, M. P. Allen, and M. P. Neal, Phys. Rev. E **54**, 559 (1996).
